# Supplementary material for: Human amnion-derived mesenchymal stem cells promote osteogenic differentiation of human bone marrow mesenchymal stem cells via H19/miR-675/APC axis
Source: publisher site journal article supplement (doi:10.18632/aging.103277), 2020-05-20
Supplement: Supplementary file [file aging-v12i11-103277-supplementary-material-SD1.pdf]

## SUPPLEMENTARY FIGURE

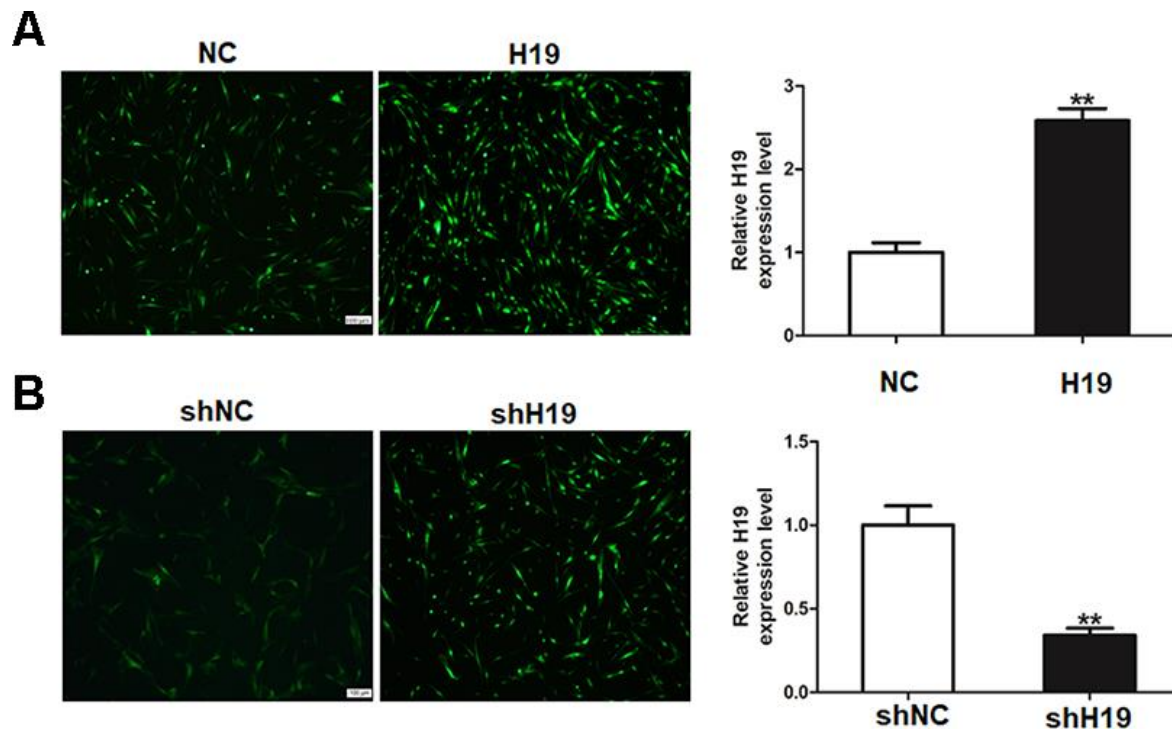

**Supplementary Figure 1. Establishment of stably expressing transfectants.** (A, B) Fluorescent photomicrographs and RT-PCR showed lentivirus transduction and relative H19 expression in NC, H19, shNC, and shH19 groups. Scale bar, 100  $\mu$ m. Data are shown as mean  $\pm$  SD. \*\*P < 0.01.
